# Supplementary material
Source: PubMed Central journal article supplement (PMC7854844)

**Supplemental Figure:** Proportion of well child visits with both ASQ-3 and MCHAT-RF completed, by site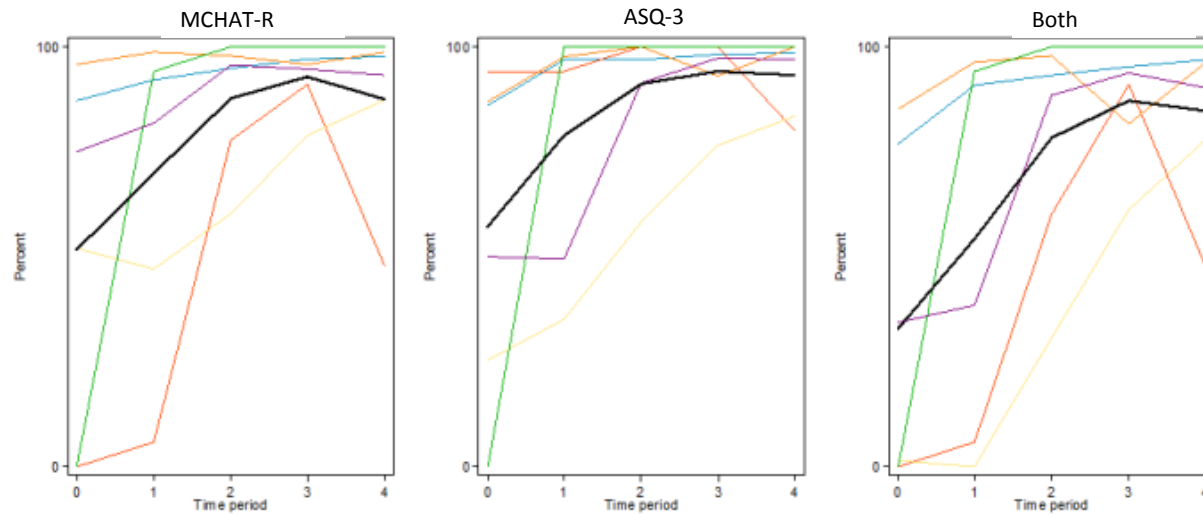

Supplement: NIHMS1622522-supplement-1.pdf [file NIHMS1622522-supplement-1.pdf]
